# Supplementary material for: Transient Receptor Potential Channel A1 (TRPA1) Regulates Sulfur Mustard-Induced Expression of Heat Shock 70 kDa Protein 6 (HSPA6) In Vitro
Source: Cells. 2018 Aug 31;7(9):126. doi: 10.3390/cells7090126 (PMC6162519; doi:10.3390/cells7090126)
Supplement: Supplementary file 1 [file cells-07-00126-s001.pdf]

## Supplementary Material

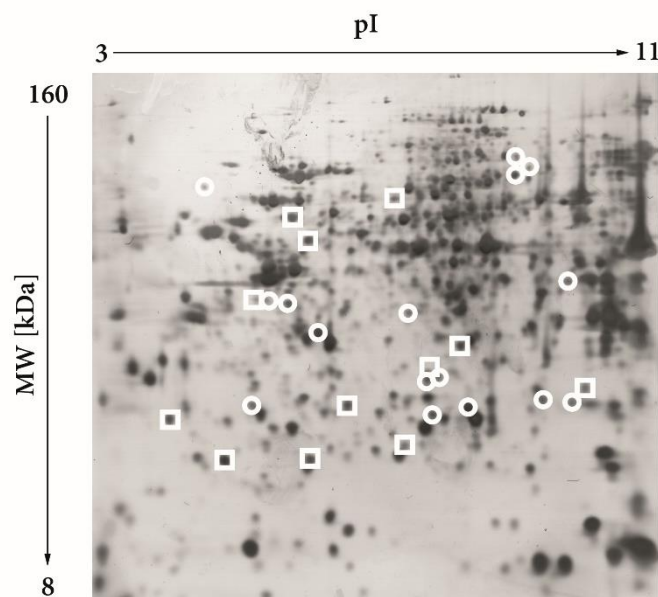

**Figure S1.** Representative 2D silver-stained gel electrophoresis of 600  $\mu$ M SM-exposed HEKA1 cells. Isoelectric focusing of cell lysates was performed by 7 cm strips (pH 3–11, non-linear). Proteins were separated by 10% Bis-Tris gels. In total, 28 differential protein spots after SM exposure compared to controls were identified. White frames represent 12 up-regulated proteins while open white circles indicate 16 down-regulated protein spots. None of these proteins spots were affected by AP18 pre-incubation. Experiments were carried out with  $n = 3$  per group. Molecular weight is indicated on the left and the pI value on top of the gels.

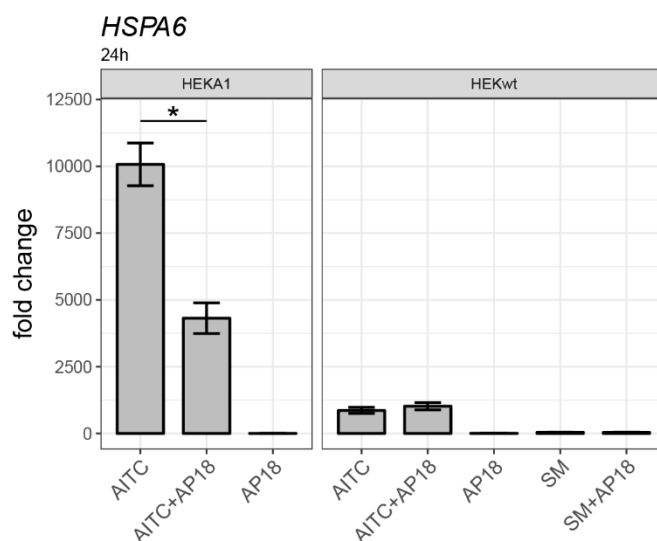

**Figure S2.** RT-qPCR measurements of relative *HSPA6* mRNA levels in HEKA1 and HEKwt cells. AITC treatment (25  $\mu$ M) resulted in a significant change of *HSPA6* mRNA levels compared to unstimulated controls (normalized to 1.0, data not shown). Pre-incubation with AP18 (2  $\mu$ M) attenuated the AITC effect significantly. AP18 alone had no effect. HEKwt cells responded with a small, rather unspecific increase of *HSPA6* gene expression that was not affected by AP18 pre-treatment. SM (600  $\mu$ M) had no effect in HEKwt cells. Significant differences are marked by asterisk. Data are derived from 3 independent experiments ( $n = 3$ ).

**Table S1.** Fold change values of RT-qPCR products in relation to controls (normalized to 1.0, data not included). Data are derived from 3 independent biological experiments ( $n = 3$ ).

| gene name      | cell type | group     | time [h] | fold change | lower 95 % CI | upper 95 % CI |
|----------------|-----------|-----------|----------|-------------|---------------|---------------|
| <i>CAPRIN1</i> | HEKA1     | SM        | 24       | 0,5         | 0,4           | 0,6           |
| <i>CAPRIN1</i> | HEKA1     | SM+AP18   | 24       | 0,5         | 0,4           | 0,5           |
| <i>ELAVL1</i>  | HEKA1     | SM        | 24       | 0,5         | 0,4           | 0,6           |
| <i>ELAVL1</i>  | HEKA1     | SM+AP18   | 24       | 0,4         | 0,3           | 0,4           |
| <i>FHL1</i>    | HEKA1     | SM        | 24       | 0,8         | 0,6           | 1,0           |
| <i>FHL1</i>    | HEKA1     | SM+AP18   | 24       | 0,7         | 0,6           | 0,8           |
| <i>GPHN</i>    | HEKA1     | SM        | 24       | 0,5         | 0,4           | 0,5           |
| <i>GPHN</i>    | HEKA1     | SM+AP18   | 24       | 0,4         | 0,4           | 0,4           |
| <i>HSPA6</i>   | A549      | SM        | 24       | 6,8         | 6,5           | 7,2           |
| <i>HSPA6</i>   | A549      | SM+AP18   | 24       | 5,0         | 4,7           | 5,3           |
| <i>HSPA6</i>   | HEKA1     | AITC      | 24       | 10073,9     | 9273,6        | 10874,2       |
| <i>HSPA6</i>   | HEKA1     | AITC+AP18 | 24       | 4314,6      | 3742,0        | 4887,1        |
| <i>HSPA6</i>   | HEKA1     | AP18      | 1        | 2,2         | 1,9           | 2,4           |
| <i>HSPA6</i>   | HEKA1     | AP18      | 3        | 2,2         | 1,9           | 2,4           |
| <i>HSPA6</i>   | HEKA1     | AP18      | 5        | 2,2         | 1,9           | 2,4           |
| <i>HSPA6</i>   | HEKA1     | AP18      | 24       | 2,2         | 1,9           | 2,4           |
| <i>HSPA6</i>   | HEKA1     | SM        | 1        | 2,0         | 1,8           | 2,2           |
| <i>HSPA6</i>   | HEKA1     | SM        | 3        | 9,5         | 8,2           | 10,8          |
| <i>HSPA6</i>   | HEKA1     | SM        | 5        | 11,7        | 10,6          | 12,8          |
| <i>HSPA6</i>   | HEKA1     | SM        | 24       | 16,0        | 14,4          | 17,6          |
| <i>HSPA6</i>   | HEKA1     | SM+AP18   | 1        | 1,7         | 1,5           | 1,9           |
| <i>HSPA6</i>   | HEKA1     | SM+AP18   | 3        | 6,7         | 6,1           | 7,4           |
| <i>HSPA6</i>   | HEKA1     | SM+AP18   | 5        | 8,7         | 7,0           | 10,4          |
| <i>HSPA6</i>   | HEKA1     | SM+AP18   | 24       | 9,8         | 8,9           | 10,7          |
| <i>HSPA6</i>   | HEKwt     | AITC      | 24       | 863,1       | 748,1         | 978,0         |
| <i>HSPA6</i>   | HEKwt     | AITC+AP18 | 24       | 1019,3      | 885,2         | 1153,9        |
| <i>HSPA6</i>   | HEKwt     | AP18      | 24       | 5,2         | 4,5           | 5,9           |
| <i>HSPA6</i>   | HEKwt     | SM        | 24       | 40,9        | 35,5          | 46,3          |
| <i>HSPA6</i>   | HEKwt     | SM+AP18   | 24       | 39,5        | 31,9          | 47,1          |
| <i>NOSIP</i>   | HEKA1     | SM        | 24       | 0,8         | 0,7           | 0,9           |
| <i>NOSIP</i>   | HEKA1     | SM+AP18   | 24       | 0,5         | 0,4           | 0,6           |
| <i>NCL</i>     | HEKA1     | SM        | 24       | 0,3         | 0,2           | 0,4           |
| <i>NCL</i>     | HEKA1     | SM+AP18   | 24       | 0,2         | 0,2           | 0,3           |
| <i>SFXN1</i>   | HEKA1     | SM        | 24       | 0,3         | 0,3           | 0,4           |
| <i>SFXN1</i>   | HEKA1     | SM+AP18   | 24       | 0,3         | 0,2           | 0,3           |
| <i>STRN4</i>   | HEKA1     | SM        | 24       | 1,4         | 1,1           | 1,7           |
| <i>STRN4</i>   | HEKA1     | SM+AP18   | 24       | 1,2         | 1,0           | 1,4           |
